# Supplementary material for: Conditions for super-adiabatic droplet growth after entrainment mixing
Source: Copernicus journal article supplement (doi:10.5194/acp-2016-94), 2016-02-05
Supplement: Supplementary file [file acp-2016-94-AC5-supplement.pdf]

## Supplementary material for “Conditions for super-adiabatic droplet growth after entrainment mixing”

Fan Yang<sup>1</sup>, Raymond Shaw<sup>1</sup> and Huiwen Xue<sup>2</sup>

<sup>1</sup>Atmospheric Sciences Program and Department of Physics, Michigan Technological University, Houghton, Michigan

<sup>2</sup>Department of Atmospheric and Oceanic Sciences, School of Physics, Peking University, Beijing, China

Table S1: Initial dry aerosol radii for different bins.

| Bin number | $r_{\text{dry}}$ (nm) | Bin number | $r_{\text{day}}$ (nm) |
|------------|-----------------------|------------|-----------------------|
| 1          | 463.7                 | 11         | 61.5                  |
| 2          | 378.9                 | 12         | 50.3                  |
| 3          | 309.6                 | 13         | 41.1                  |
| 4          | 253.0                 | 14         | 33.6                  |
| 5          | 206.7                 | 15         | 27.4                  |
| 6          | 168.9                 | 16         | 22.4                  |
| 7          | 138.0                 | 17         | 18.3                  |
| 8          | 112.8                 | 18         | 15.0                  |
| 9          | 92.1                  | 19         | 12.2                  |
| 10         | 75.3                  | 20         | 10.0                  |

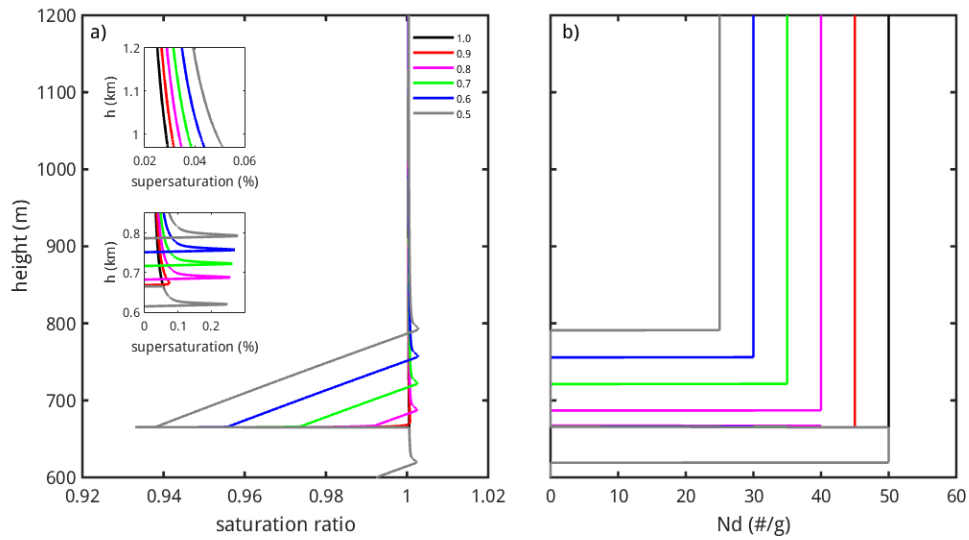

Figure S1: (a) Saturation ratio and (b) cloud droplet number concentration profiles for various cloud mixing fractions when monodisperse cloud droplets mix with clean environment air with low updraft velocity ( $0.1 \text{ ms}^{-1}$ ).

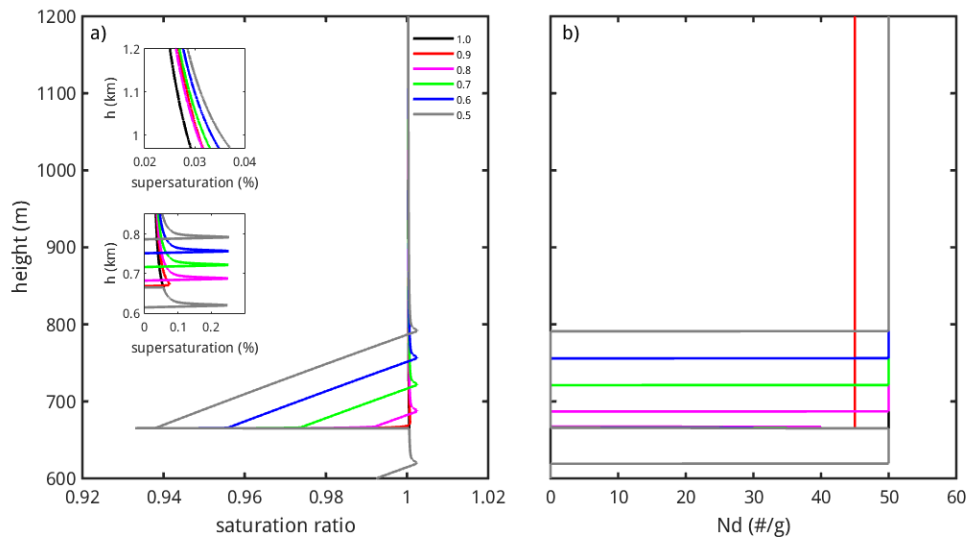

Figure S2: (a) Saturation ratio and (b) cloud droplet number concentration profiles for various cloud mixing fractions when monodisperse cloud droplets mix with polluted environment air with low updraft velocity ( $0.1 \text{ ms}^{-1}$ ).

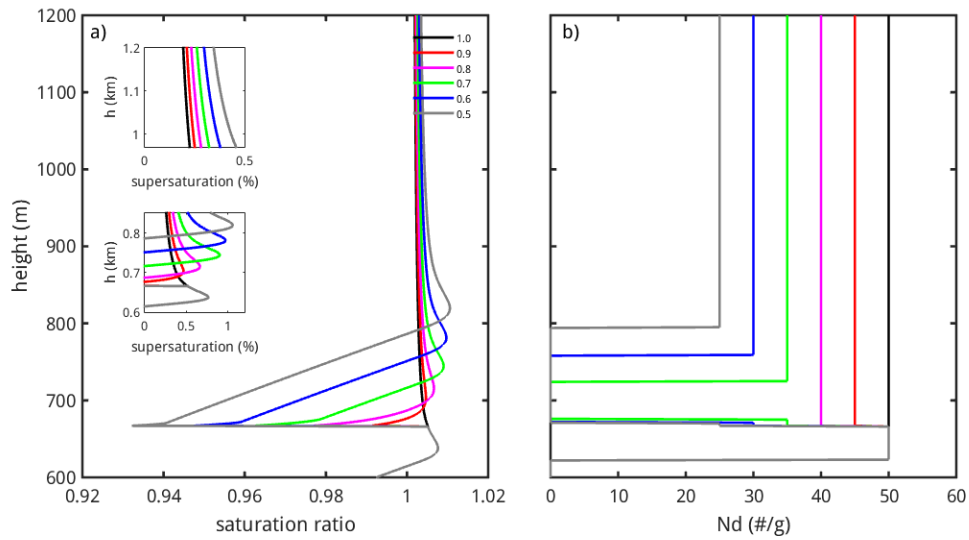

Figure S3: (a) Saturation ratio and (b) cloud droplet number concentration profiles for various cloud mixing fractions when monodisperse cloud droplets mix with clean environment air with high updraft velocity ( $1.0 \text{ ms}^{-1}$ ).

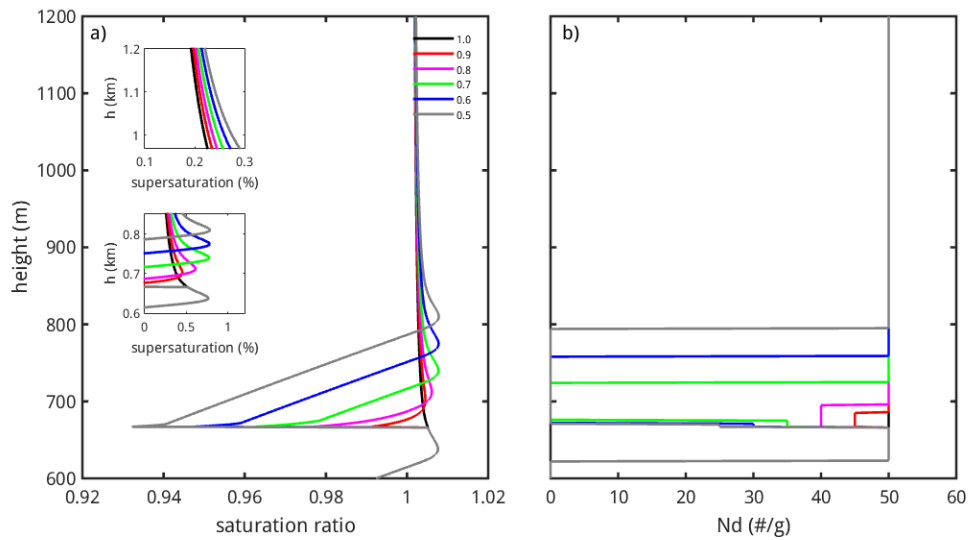

Figure S4: (a) Saturation ratio and (b) cloud droplet number concentration profiles for various cloud mixing fractions when monodisperse cloud droplets mix with polluted environment air with high updraft velocity ( $1.0 \text{ ms}^{-1}$ ).

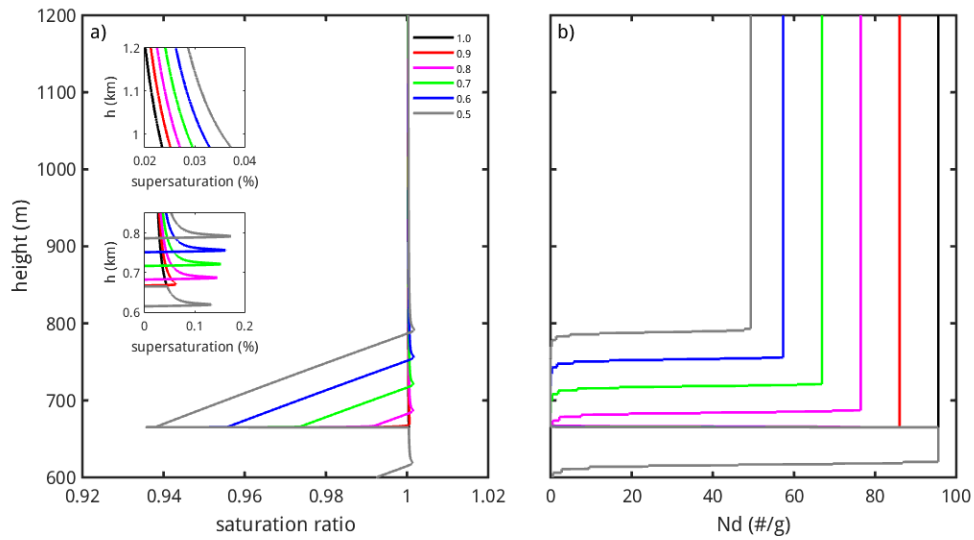

Figure S5: (a) Saturation ratio and (b) cloud droplet number concentration profiles for various cloud mixing fractions when polydisperse cloud droplets mix with clean environment air with low updraft velocity ( $0.1 \text{ ms}^{-1}$ ).

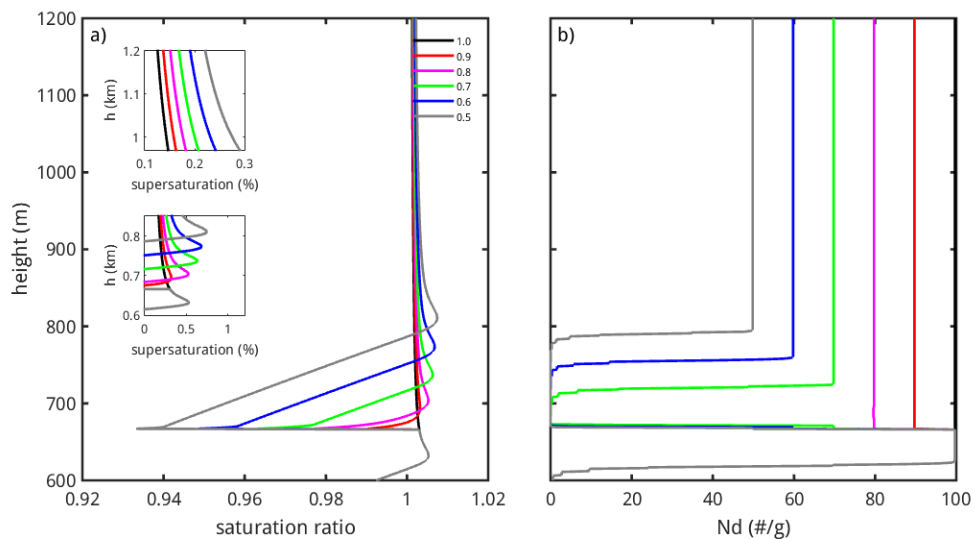

Figure S6: (a) Saturation ratio and (b) cloud droplet number concentration profiles for various cloud mixing fractions when polydisperse cloud droplets mix with clean environment air with high updraft velocity ( $1.0 \text{ ms}^{-1}$ ).
